# Supplementary material
Source: Royal Society of Chemistry journal article supplement (doi:10.1039/d6fd00058d)
Supplement: d6fd00058d1.pdf [file d6fd00058d1.pdf]

## Faraday Discussions

### SUPPLEMENTARY INFORMATION

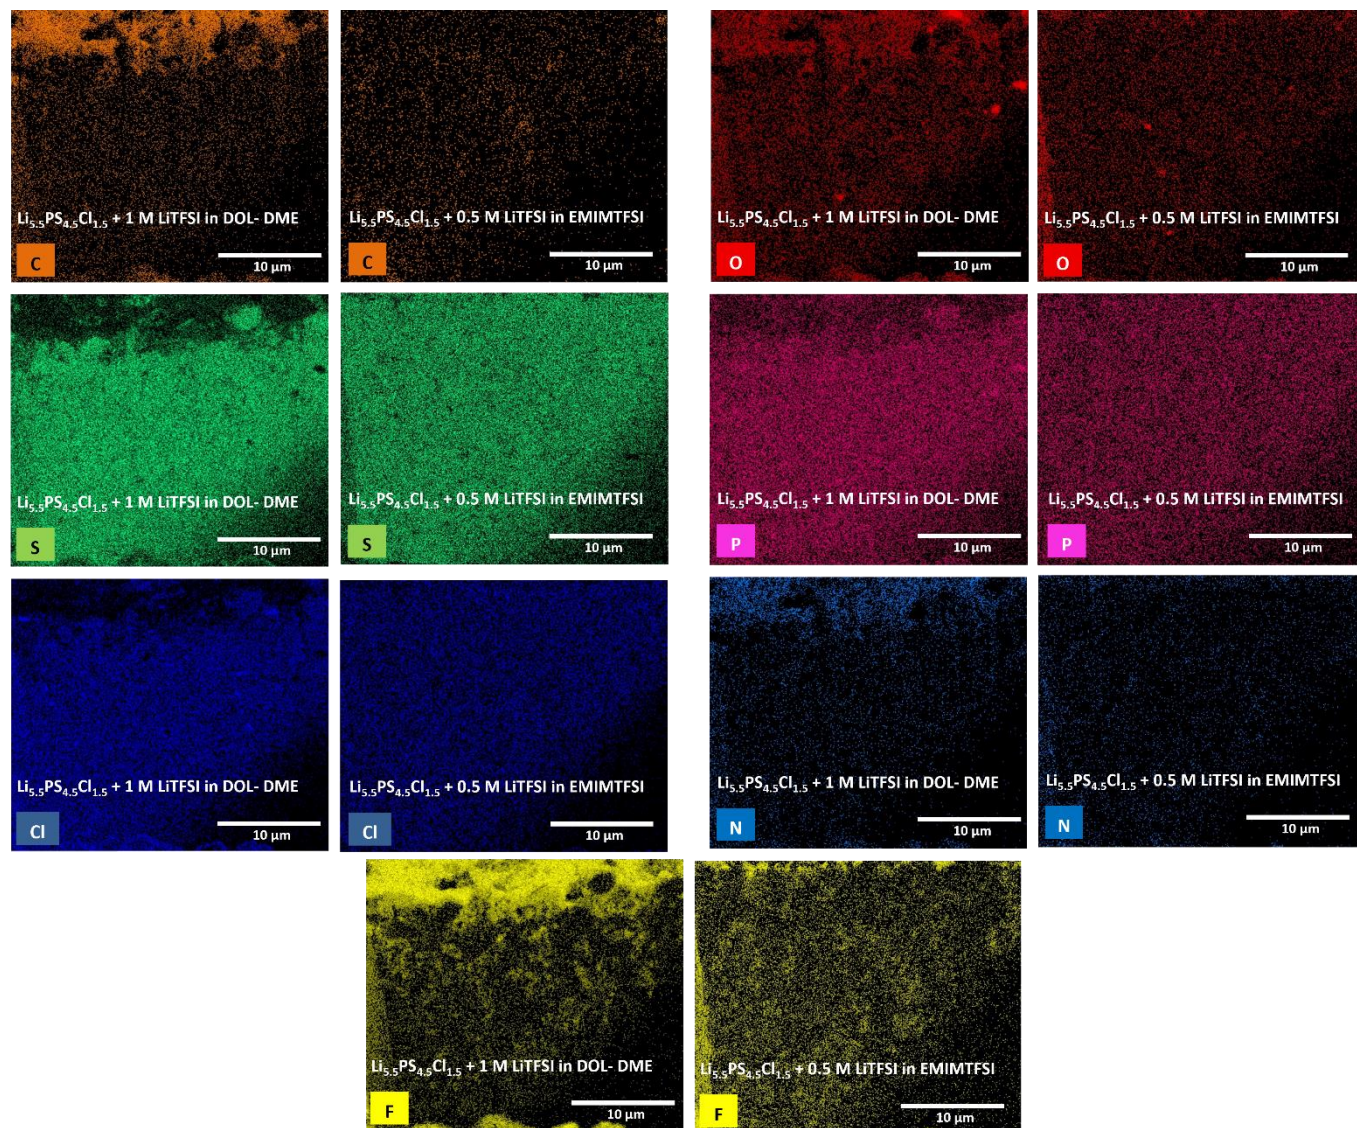

**Supplementary Figure 1:** EDX elemental distribution mapping corresponding with secondary electron imaging shown in Figure 1. The left image in each pair shows elemental mapping of a  $\text{Li}_{5.5}\text{PS}_{4.5}\text{Cl}_{1.5}$  disk after immersion for 250 hours in 1 M LiTFSI in DOL-DME (1:1). The right image in each pair shows elemental mapping of a  $\text{Li}_{5.5}\text{PS}_{4.5}\text{Cl}_{1.5}$  disk after immersion for 250 hours in 0.5 M LiTFSI in EMIMTFSI. The maps show the elemental distributions of carbon (orange), oxygen (red), sulfur (green), phosphorous (pink), chlorine (blue), nitrogen (light blue), and fluorine (yellow).

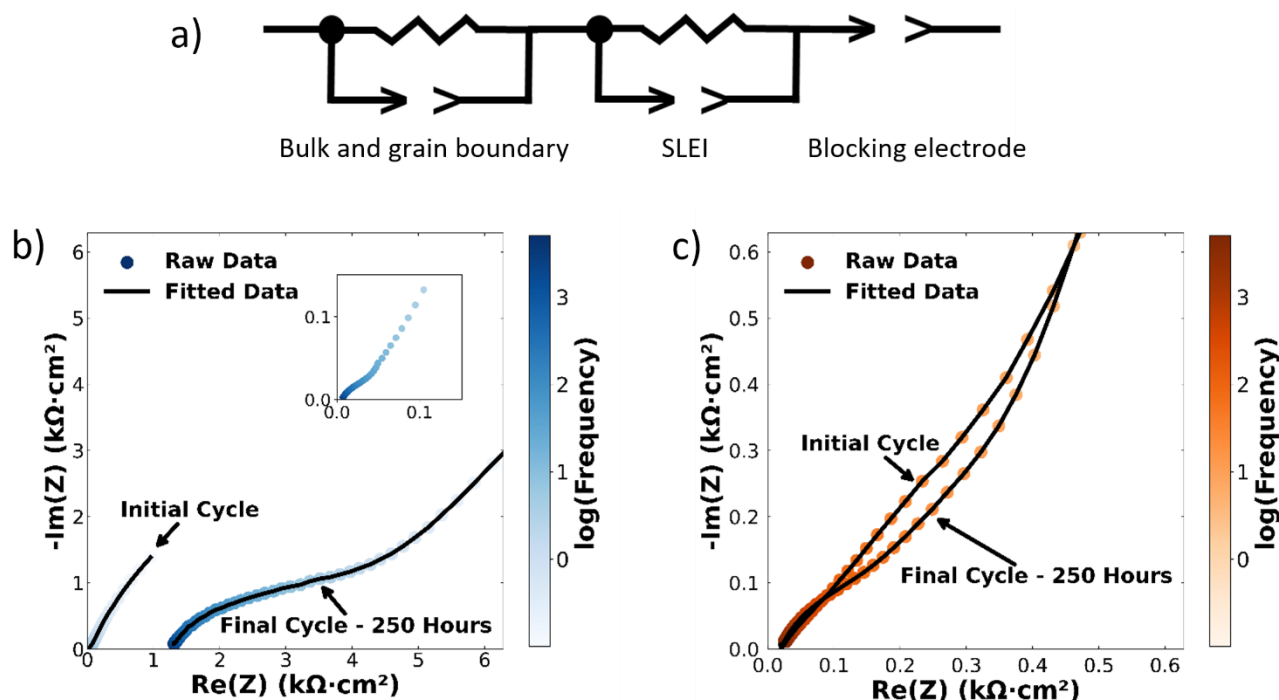

**Supplementary Figure 2:** Fitting of the time-resolved electrochemical impedance spectroscopy shown in Figure 2. a) The equivalent circuit model used to fit the data:  $(R_{\text{bulk+gb}}C_{\text{bulk+gb}})(R_{\text{SLEI}}C_{\text{SLEI}})CPE$ . Individual fittings of the first and final Nyquist plots for symmetric cells using the liquid electrolytes: b) 1 M LiTFSI in DOL-DME (1:1) (blue), and c) 0.5 M LiTFSI in EMIMTFSI (orange).

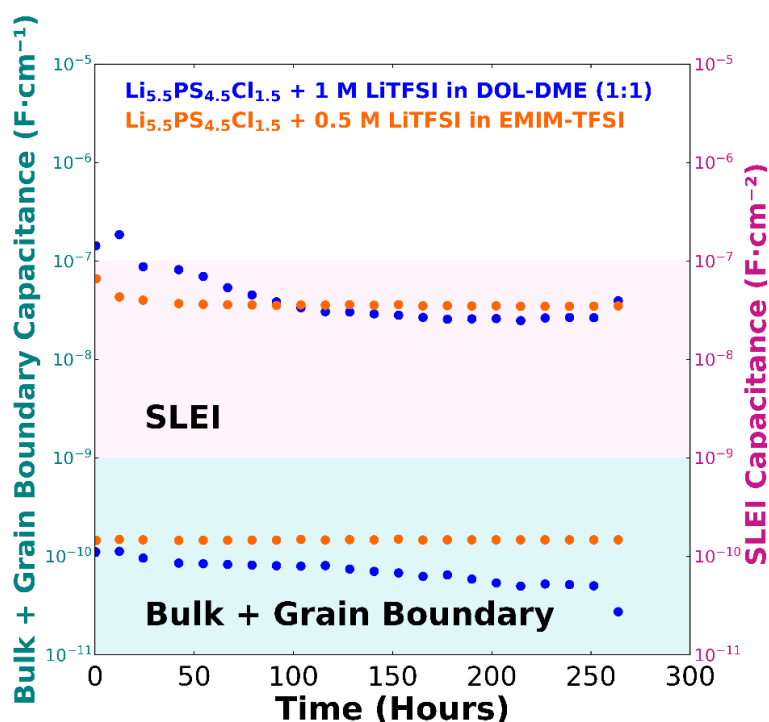

**Supplementary Figure 3.** Graph showing the normalised capacitances of bulk + grain boundary transport processes (green), and transport through the solid-liquid electrolyte interphase (pink) with time. Capacitances remain largely stable with time. Blue points show capacitances of transport processes in the symmetric cell with 1 M LiTFSI in DOL-DME (1:1) liquid electrolyte, and orange points show capacitances of transport processes in the symmetric cell with 0.5 M LiTFSI in EMIMTFSI liquid electrolyte.

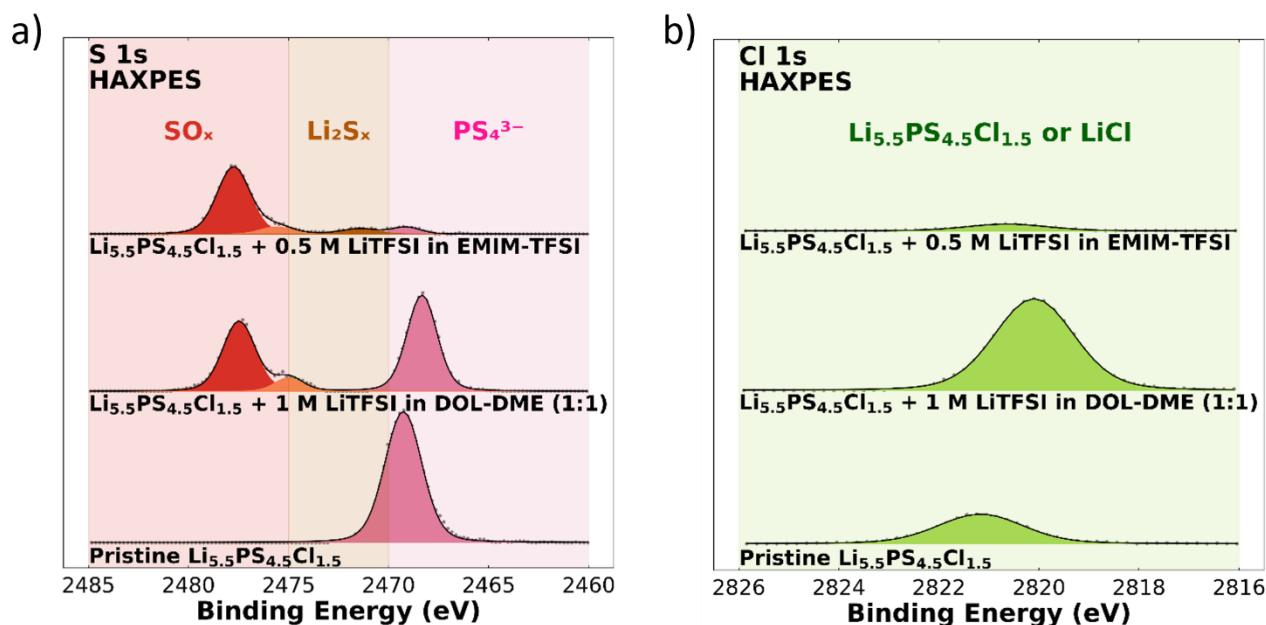

**Supplementary Figure 4:** HAXPES of (a) the S 1s region, and (b) the Cl 1s region for: Pristine Li<sub>5.5</sub>PS<sub>4.5</sub>Cl<sub>1.5</sub> (bottom), Li<sub>5.5</sub>PS<sub>4.5</sub>Cl<sub>1.5</sub> immersed in 1 M LiTFSI in DOL-DME (1:1) for 250 h (middle), and Li<sub>5.5</sub>PS<sub>4.5</sub>Cl<sub>1.5</sub> in 0.5 M LiTFSI in EMIMTFSI for 250 h (top). Fittings show the presence of SO<sub>4</sub><sup>2-</sup> species (red), SO<sub>3</sub><sup>2-</sup> species (orange), Li<sub>2</sub>S<sub>x</sub> species (brown) and PS<sub>4</sub><sup>3-</sup> species (pink), and Li<sub>5.5</sub>PS<sub>4.5</sub>Cl<sub>1.5</sub>/LiCl (light green).

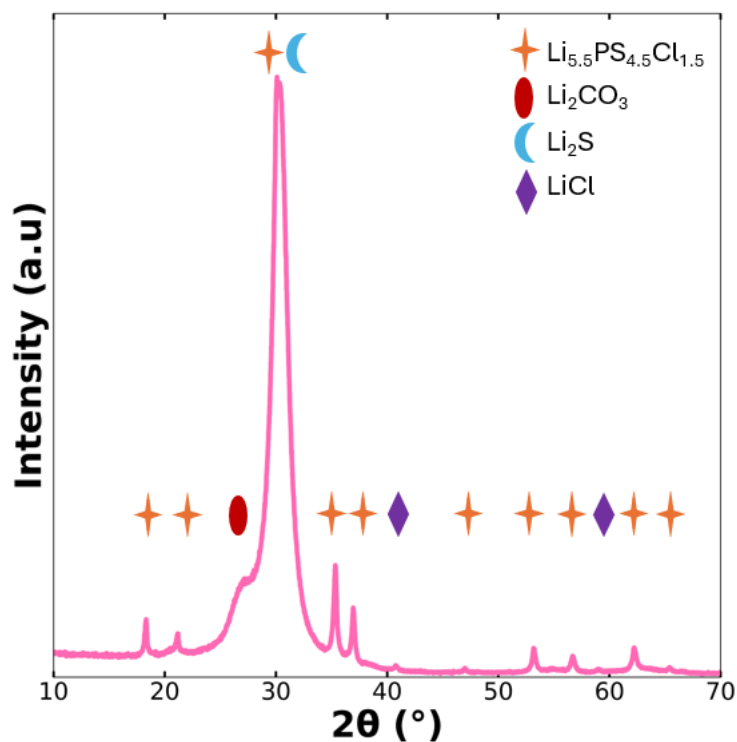

**Supplementary Figure 5:** Powder X-ray diffraction of pristine Li<sub>5.5</sub>PS<sub>4.5</sub>Cl<sub>1.5</sub>. Symbols indicate reference PXRD patterns: Li<sub>5.5</sub>PS<sub>4.5</sub>Cl<sub>1.5</sub> (orange star) and common impurity phases of Li<sub>2</sub>CO<sub>3</sub> (red oval), Li<sub>2</sub>S (blue crescent) and LiCl (purple diamond). It is possible that some of the impurities are observed due to side reactions from moisture sensitivity.
